# Supplementary material for: Exogenous CFH Modulates Levels of Pro-Inflammatory Mediators to Prevent Oxidative Damage of Retinal Pigment Epithelial Cells with the At-Risk CFH Y402H Variant
Source: MDPI journal article supplement (doi:10.3390/antiox12081540), 2023-07-31
Supplement: s1 [file s1]

Exogenous CFH Modulates Levels of Pro-Inflammatory Mediators to Prevent Oxidative Damage of Retinal Pigment Epithelial Cells with the At-Risk CFH Y402H Variant

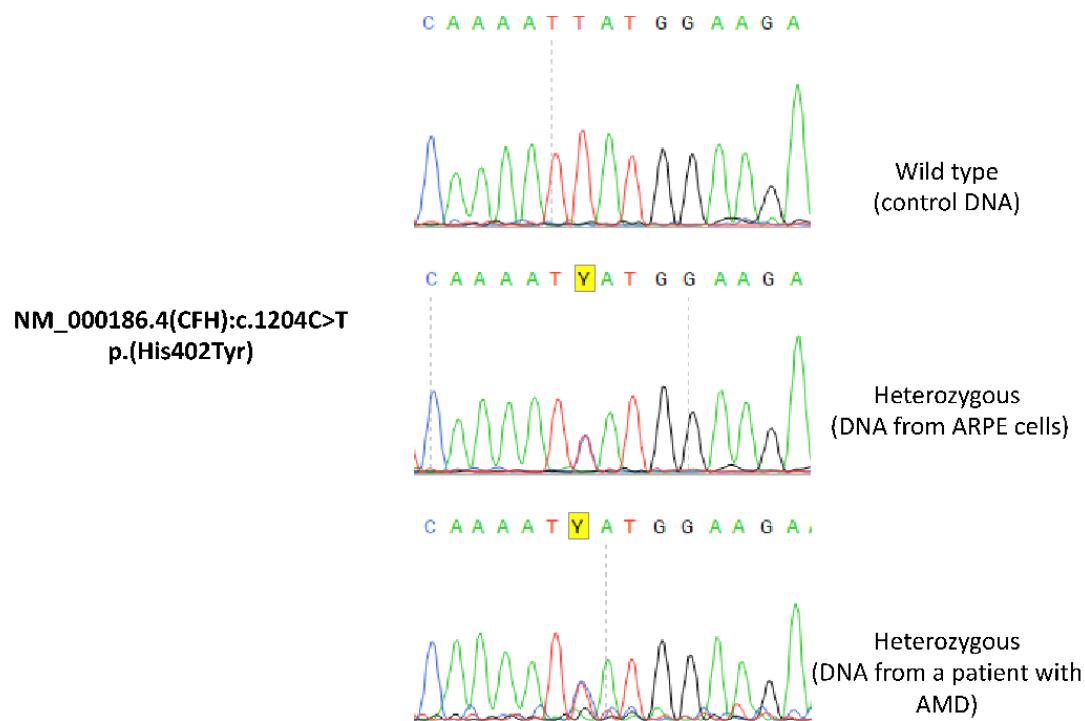

**Figure S1.** Partial Sanger sequencing of the CFH gen. Sanger sequencing from a wild-type individual, heterozygous c.1204T>C variant in ARPE-19 cells, and heterozygous c.1204T>C from a patient with AMD.
